# Supplementary material for: Discovering gene annotations in biomedical text databases
Source: PubMed Central journal article supplement (PMC2335285; doi:10.1186/1471-2105-9-143), 2008-03-06
Supplement: 1471-2105-9-143-S2.pdf [file 1471-2105-9-143-S2.pdf]

## Appendix 1 – Experimental GO Concept Set

| <b>GOID</b> | <b>Precision</b> | <b>Recall</b> | <b>GO Level</b> | <b>Subontology</b> | <b>Description</b>                                                   |
|-------------|------------------|---------------|-----------------|--------------------|----------------------------------------------------------------------|
| GO:0000074  | 51.7             | 76.7          | 6               | biological_process | regulation of progression through cell cycle                         |
| GO:0000122  | 69.6             | 50.2          | 10              | biological_process | negative regulation of transcription from RNA polymerase II promoter |
| GO:0000398  | 80.6             | 88.0          | 11              | biological_process | nuclear mRNA splicing via spliceosome                                |
| GO:0001501  | 80.1             | 89.7          | 5               | biological_process | skeletal development                                                 |
| GO:0003702  | 38.8             | 77.7          | 3               | molecular_function | RNA polymerase II transcription factor activity                      |
| GO:0003704  | 68.1             | 64.4          | 4               | molecular_function | specific RNA polymerase II transcription factor activity             |
| GO:0003713  | 26.6             | 58.9          | 6               | molecular_function | transcription coactivator activity                                   |
| GO:0003714  | 71.5             | 57.9          | 6               | molecular_function | transcription corepressor activity                                   |
| GO:0003723  | 26.1             | 64.6          | 4               | molecular_function | RNA binding                                                          |
| GO:0003924  | 49.8             | 77.3          | 8               | molecular_function | GTPase activity                                                      |
| GO:0004672  | 35.6             | 89.3          | 6               | molecular_function | protein kinase activity                                              |
| GO:0004674  | 40.8             | 74.6          | 7               | molecular_function | protein serine threonine kinase activity                             |
| GO:0004725  | 64.6             | 90.6          | 8               | molecular_function | protein tyrosine phosphatase activity                                |
| GO:0004842  | 79.2             | 62.7          | 7               | molecular_function | ubiquitin protein ligase activity                                    |
| GO:0004871  | 29.2             | 75.0          | 2               | molecular_function | signal transducer activity                                           |
| GO:0004888  | 63.1             | 95.2          | 4               | molecular_function | transmembrane receptor activity                                      |
| GO:0005102  | 66.7             | 100.0         | 4               | molecular_function | receptor binding                                                     |
| GO:0005198  | 33.3             | 100.0         | 2               | molecular_function | structural molecule activity                                         |
| GO:0005200  | 75.5             | 81.3          | 3               | molecular_function | structural constituent of cytoskeleton                               |
| GO:0005215  | 35.5             | 95.2          | 2               | molecular_function | transporter activity                                                 |
| GO:0005489  | 52.0             | 90.5          | 1               | molecular_function | electron transporter activity                                        |
| GO:0005509  | 43.8             | 90.6          | 5               | molecular_function | calcium ion binding                                                  |
| GO:0005524  | 61.0             | 86.7          | 6               | molecular_function | ATP binding                                                          |
| GO:0005554  | 66.7             | 100.0         | 2               | molecular_function | molecular function unknown                                           |
| GO:0005576  | 43.9             | 100.0         | 2               | cellular_component | extracellular region                                                 |
| GO:0005578  | 68.0             | 96.4          | 4               | cellular_component | extracellular matrix (sensu Metazoa)                                 |
| GO:0005615  | 39.9             | 74.6          | 4               | cellular_component | extracellular space                                                  |
| GO:0005624  | 15.7             | 91.7          | 5               | cellular_component | membrane fraction                                                    |
| GO:0005625  | 18.1             | 83.3          | 5               | cellular_component | soluble fraction                                                     |
| GO:0005635  | 60.2             | 71.3          | 10              | cellular_component | nuclear envelope                                                     |
| GO:0005643  | 83.8             | 71.8          | 13              | cellular_component | nuclear pore                                                         |
| GO:0005654  | 42.6             | 70.4          | 11              | cellular_component | nucleoplasm                                                          |
| GO:0005730  | 73.3             | 71.7          | 11              | cellular_component | nucleolus                                                            |
| GO:0005741  | 71.7             | 82.7          | 12              | cellular_component | mitochondrial outer membrane                                         |
| GO:0005743  | 80.1             | 86.1          | 12              | cellular_component | mitochondrial inner membrane                                         |
| GO:0005759  | 82.2             | 77.5          | 11              | cellular_component | mitochondrial matrix                                                 |
| GO:0005768  | 81.7             | 78.0          | 8               | cellular_component | endosome                                                             |
| GO:0005777  | 82.5             | 78.5          | 9               | cellular_component | peroxisome                                                           |
| GO:0005783  | 44.5             | 61.7          | 8               | cellular_component | endoplasmic reticulum                                                |
| GO:0005789  | 62.0             | 72.2          | 10              | cellular_component | endoplasmic reticulum membrane                                       |
| GO:0005794  | 68.8             | 74.0          | 8               | cellular_component | Golgi apparatus                                                      |
| GO:0005829  | 46.0             | 73.3          | 8               | cellular_component | cytosol                                                              |
| GO:0005856  | 62.7             | 95.2          | 8               | cellular_component | cytoskeleton                                                         |
| GO:0005935  | 73.7             | 62.1          | 5               | cellular_component | bud neck                                                             |
| GO:0005975  | 75.0             | 100.0         | 5               | biological_process | carbohydrate metabolism                                              |

|            |      |      |    |                    |                                                             |
|------------|------|------|----|--------------------|-------------------------------------------------------------|
| GO:0006260 | 71.4 | 94.3 | 7  | biological_process | DNA replication                                             |
| GO:0006281 | 75.8 | 82.9 | 7  | biological_process | DNA repair                                                  |
| GO:0006350 | 48.3 | 90.0 | 6  | biological_process | transcription                                               |
| GO:0006355 | 42.6 | 68.8 | 8  | biological_process | regulation of transcription DNA dependent                   |
| GO:0006357 | 39.9 | 67.2 | 9  | biological_process | regulation of transcription from RNA polymerase II promoter |
| GO:0006364 | 97.5 | 81.0 | 8  | biological_process | rRNA processing                                             |
| GO:0006406 | 84.9 | 68.7 | 11 | biological_process | mRNA export from nucleus                                    |
| GO:0006412 | 65.4 | 81.1 | 7  | biological_process | protein biosynthesis                                        |
| GO:0006457 | 46.4 | 70.5 | 7  | biological_process | protein folding                                             |
| GO:0006461 | 44.3 | 68.4 | 6  | biological_process | protein complex assembly                                    |
| GO:0006470 | 64.7 | 72.7 | 8  | biological_process | protein amino acid dephosphorylation                        |
| GO:0006487 | 66.7 | 80.2 | 10 | biological_process | protein amino acid N linked glycosylation                   |
| GO:0006508 | 38.6 | 85.2 | 7  | biological_process | proteolysis                                                 |
| GO:0006511 | 64.7 | 59.6 | 11 | biological_process | ubiquitin dependent protein catabolism                      |
| GO:0006623 | 66.8 | 69.8 | 10 | biological_process | protein targeting to vacuole                                |
| GO:0006629 | 49.3 | 91.7 | 5  | biological_process | lipid metabolism                                            |
| GO:0006810 | 48.5 | 89.6 | 5  | biological_process | transport                                                   |
| GO:0006813 | 88.6 | 91.2 | 9  | biological_process | potassium ion transport                                     |
| GO:0006886 | 72.7 | 73.3 | 8  | biological_process | intracellular protein transport                             |
| GO:0006888 | 70.8 | 56.1 | 9  | biological_process | ER to Golgi vesicle mediated transport                      |
| GO:0006897 | 72.3 | 70.4 | 7  | biological_process | endocytosis                                                 |
| GO:0006915 | 58.5 | 72.4 | 6  | biological_process | apoptosis                                                   |
| GO:0006916 | 61.1 | 66.2 | 9  | biological_process | anti apoptosis                                              |
| GO:0006917 | 85.5 | 67.0 | 9  | biological_process | induction of apoptosis                                      |
| GO:0006928 | 49.7 | 81.7 | 5  | biological_process | cell motility                                               |
| GO:0006935 | 69.3 | 60.0 | 6  | biological_process | chemotaxis                                                  |
| GO:0006936 | 91.7 | 90.6 | 4  | biological_process | muscle contraction                                          |
| GO:0006950 | 54.9 | 76.8 | 3  | biological_process | response to stress                                          |
| GO:0006954 | 54.5 | 68.6 | 6  | biological_process | inflammatory response                                       |
| GO:0006955 | 45.4 | 73.3 | 5  | biological_process | immune response                                             |
| GO:0006968 | 60.4 | 77.1 | 5  | biological_process | cellular defense response                                   |
| GO:0006979 | 74.5 | 63.4 | 6  | biological_process | response to oxidative stress                                |
| GO:0007047 | 76.8 | 78.0 | 6  | biological_process | cell wall organization and biogenesis                       |
| GO:0007050 | 88.3 | 65.4 | 8  | biological_process | cell cycle arrest                                           |
| GO:0007124 | 63.9 | 68.9 | 8  | biological_process | pseudohyphal growth                                         |
| GO:0007126 | 78.2 | 75.7 | 7  | biological_process | meiosis                                                     |
| GO:0007131 | 81.1 | 69.7 | 9  | biological_process | meiotic recombination                                       |
| GO:0007155 | 18.7 | 93.8 | 3  | biological_process | cell adhesion                                               |
| GO:0007166 | 56.9 | 79.3 | 5  | biological_process | cell surface receptor linked signal transduction            |
| GO:0007186 | 59.1 | 83.0 | 6  | biological_process | G protein coupled receptor protein signaling pathway        |
| GO:0007242 | 53.2 | 81.0 | 5  | biological_process | intracellular signaling cascade                             |
| GO:0007243 | 61.1 | 66.7 | 6  | biological_process | protein kinase cascade                                      |
| GO:0007268 | 51.6 | 83.1 | 6  | biological_process | synaptic transmission                                       |
| GO:0007283 | 84.6 | 72.5 | 6  | biological_process | spermatogenesis                                             |
| GO:0007399 | 31.9 | 80.1 | 4  | biological_process | nervous system development                                  |
| GO:0007417 | 48.8 | 92.9 | 5  | biological_process | central nervous system development                          |
| GO:0007517 | 86.7 | 82.5 | 5  | biological_process | muscle development                                          |
| GO:0007601 | 78.9 | 80.4 | 7  | biological_process | visual perception                                           |

|            |      |       |    |                    |                                                                      |
|------------|------|-------|----|--------------------|----------------------------------------------------------------------|
| GO:0008076 | 93.3 | 88.0  | 9  | cellular_component | voltage gated potassium channel complex                              |
| GO:0008083 | 94.4 | 94.4  | 5  | molecular_function | growth factor activity                                               |
| GO:0008270 | 75.5 | 85.8  | 6  | molecular_function | zinc ion binding                                                     |
| GO:0008284 | 43.3 | 83.3  | 6  | biological_process | positive regulation of cell proliferation                            |
| GO:0008285 | 37.8 | 77.0  | 6  | biological_process | negative regulation of cell proliferation                            |
| GO:0008380 | 83.5 | 88.5  | 8  | biological_process | RNA splicing                                                         |
| GO:0008544 | 68.5 | 87.3  | 5  | biological_process | epidermis development                                                |
| GO:0008565 | 81.5 | 70.8  | 3  | molecular_function | protein transporter activity                                         |
| GO:0009060 | 91.7 | 80.7  | 8  | biological_process | aerobic respiration                                                  |
| GO:0009653 | 45.8 | 89.7  | 3  | biological_process | morphogenesis                                                        |
| GO:0009887 | 58.3 | 100.0 | 5  | biological_process | organ morphogenesis                                                  |
| GO:0016192 | 68.0 | 64.0  | 6  | biological_process | vesicle mediated transport                                           |
| GO:0016481 | 76.6 | 66.1  | 8  | biological_process | negative regulation of transcription                                 |
| GO:0016563 | 48.8 | 85.5  | 3  | molecular_function | transcriptional activator activity                                   |
| GO:0016564 | 72.5 | 66.4  | 3  | molecular_function | transcriptional repressor activity                                   |
| GO:0016887 | 51.7 | 86.0  | 8  | molecular_function | ATPase activity                                                      |
| GO:0019735 | 65.6 | 61.7  | 8  | biological_process | antimicrobial humoral response (sensu Vertebrata)                    |
| GO:0030036 | 54.2 | 62.0  | 8  | biological_process | actin cytoskeleton organization and biogenesis                       |
| GO:0030437 | 77.3 | 80.1  | 6  | biological_process | sporulation (sensu Fungi)                                            |
| GO:0045944 | 46.3 | 72.1  | 10 | biological_process | positive regulation of transcription from RNA polymerase II promoter |
| GO:0051082 | 58.0 | 62.8  | 4  | molecular_function | unfolded protein binding                                             |
